# Supplementary material
Source: publisher site journal article supplement (https://www.dovepress.com/article/569311)
Supplement: Supplementary file 1 [file 569311%20Revised%20Supplementary%20Materials.docx]

**Supplementary Material 1: machine learning algorithms used in the study.**

A general structure of a machine learning (ML)-based predictive model is based on 2 phases: Phase 1, the model is trained from historical data (training phase); and Phase 2, the outcome is generated from the new test data (testing phase).

A brief description of the ML classification algorithms used in this study is provided here1.

***Random Forest*** (RF) is a commonly used supervised [ML](https://www.ibm.com/topics/supervised-learning) algorithm that manages many decision trees to make better predictions. Each tree looks at different random parts of the data and are combined by voting for classification or averaging regression. Since RF algorithms can handle large data sets, they can provide more accurate predictions, but can be slow to process data as they are computing data for each individual decision tree. RF reduces the risk of overfitting.

***Support vector machine*** (SVM) is a supervised [ML](https://www.ibm.com/topics/supervised-learning) algorithm that classifies data by finding an optimal line that maximizes the distance between each class in an N-dimensional space to find the best decision boundary between classes. This enables to generalize well to new data and make accurate classification predictions. The lines that are adjacent to the optimal hyperplane are known as support vectors as these vectors run through the data points that determine the maximal margin. The SVM algorithm is widely used in [ML](https://www.ibm.com/think/topics/machine-learning) as it can handle both linear and nonlinear classification tasks. However, when the data set contains more noise, such as overlapping target classes, SVM does not perform well.

***Decision tree***is a non-parametric supervised learning algorithm, which is utilized for both classification and regression tasks. It has a hierarchical, tree structure, which consists of a root node, branches, internal nodes and leaf nodes. A decision tree starts with a root node. The outgoing branches from the root node then feed into the internal nodes, also known as decision nodes. Both node types conduct evaluations to form homogenous subsets, which are denoted by leaf nodes, or terminal nodes. The leaf nodes represent all the possible outcomes within the dataset.

***Gaussian Naive Bayes*** is a supervised classification ML algorithm based on the probabilistic approach and Gaussian distribution (normal distribution). It assumes that each parameter has an independent capacity of predicting the output variable. The combination of the prediction for all parameters is the final prediction that returns a probability of the dependent variable to be classified in each group. The final classification is assigned to the group with the higher probability. The main advantage, compared to more sophisticated approaches, is the need of a small amount of training data to estimate the necessary parameters. However, its performance may affect due to its strong assumptions on features independence.

***K-Nearest Neighbors (KNN)*** is a non-parametric supervised ML algorithm generally used for classification but can also be used for regression tasks. It works by finding the "k" closest data points (neighbors) to a given input and makes a prediction based on the majority class (for classification) or the average value (for regression). The biggest issue with KNN is to choose the optimal number of neighbors to be considered.

The **SMOTE** (Synthetic Minority Oversampling Technique) is applied for handling imbalanced data. SMOTE aims to balance class distribution by randomly increasing minority class examples by replicating them. SMOTE synthesizes new minority instances between existing minority instances. These training records are generated by randomly selecting one or more of the k-nearest neighbors for each example in the minority class. After the oversampling process, the data is reconstructed, and several classification models can be applied for the processed data.

Other specific data that appear in this manuscript are2:

1. *Recall,* also called sensitivity, measures the model's ability to detect positive events correctly. It is the percentage of accurately predicted positive events out of all actual positive events.
2. Area Under the Receiver Operating Characteristic Curve (AUC-ROC) represents the probability that the model, if given a randomly chosen positive and negative example, will rank the positive higher than negative.
3. Youden's Index is a statistical measure used to assess the effectiveness of a diagnostic test. It is calculated as the maximum vertical distance between the curve of true positive rates (sensitivity) and false positive rates (1-specificity) on a ROC curve This index helps determine the optimal cut-off point for a test, balancing sensitivity and specificity, making it essential for evaluating diagnostic performance.
4. The *F1 Score* is described as the harmonic mean of the precision and recall of a classification model. The two metrics contribute equally to the score, ensuring that the F1 metric correctly indicates the reliability of a model.
5. The *Matthews Correlation Coefficient* (MCC) is a measure of the quality of binary classifications. It takes into account all four elements of a confusion matrix: true positives, true negatives, false positives, and false negatives. The MCC can be understood as a correlation coefficient between the predicted and actual classifications, ranging from -1 to +1. An MCC of +1 indicates perfect predictions, 0 indicates no better than random guessing, and -1 indicates total disagreement between predictions and true outcomes

**Table S1: Calibration metrics for the machine learning algorithms.**

| **Model** | **Brier score** | **Calibration score** | **CITL** |
| --- | --- | --- | --- |
| RF | 0.12 | 1.03 | 0.03 |
| KNN | 0.16 | 1.08 | 0.04 |
| SVM | 0.17 | 0.94 | 0.05 |
| DT | 0.18 | 1.13 | 0.06 |
| GNB | 0.20 | 1.14 | 0.08 |

Lower Brier scores indicate better overall probabilistic accuracy. Calibration slopes closer to 1 and calibration-in-the-large (CITL) values closer to 0 indicate better calibration. All metrics were estimated from out-of-fold predictions using decile-based calibration curves.

**Abbreviations:** SVM: Support Vector Machine; DT: Decision Tree; GNB: Gaussian Naive Bayes; KNN: K-nearest neighbors; RF: Random Forest; CITL: Calibration in the large.

**Supplementary Material 2: TRIPOD flow diagram of study population and model development.**

- **Participants assessed for eligibility:**
  86 patients with non-severe hemophilia A
- **Excluded:**
  2 patients due to incomplete clinical or laboratory data
- **Included in analysis:**
  84 patients
  - Joint damage present (HEAD-US > 0): n = 35
  - No joint damage: n = 49
- **Predictors considered:**
  Age, target-joint history, FVIII-CLOT, FVIII-CHR, FVIII-CLOT/FVIII-CHR ratio, thrombin-generation parameters
- **Model development and validation:**
  - Multiple imputation by chained equations.
  - Z-score normalization
  - SMOTE applied within training folds
  - Nested stratified 5-fold cross-validation repeated 100 times

**Abbreviations**: FVIII-CLOT: clotting FVIII; FVIII-CHR: chromogenic FVIII.

**References.**

1. Mahesh B, Machine learning algorithms: a review. Int J Sci Res 2018; 9:381-386.
2. Rainio O, Teuho J, Klen R. Evaluation metrics and statistical tests for machine learning. Sci Rep 2024; 14:6086.
